# Supplementary material for: The Expression of Pax6 Genes in an Eyeless Arachnid Suggests Their Ancestral Role in Arachnid Head Development
Source: Research Square preprint supplement (doi:10.21203/rs.3.rs-5920582/v1), 2025-01-30
Supplement: Supplementary file 1 [file 046957fcb0a6416a4741418e.docx]

| Gene | Transcript | HCR Amplifier |
| --- | --- | --- |
| *Al-arrestin-1* | TRINITY_GG_3318_c59_g1_i3 | B3 |
| *Al-arrestin-2* | TRINITY_GG_4713_c203_g1_i1 | B1 |
| *Al-ato* | TRINITY_GG_4863_c1996_g1_i1 | B2 |
| *Al-dac* | TRINITY_GG_5120_c350_g1_i2 | B2 |
| *Al-ey* | TRINITY_GG_2648_c164_g1_i2 | B1 |
| *Al-eya* | TRINITY_GG_4744_c173_g1_i10 | B2 |
| *Al-krz* | TRINITY_GG_5120_c51_g1_i7 | B2 |
| *Al-myoIII* | TRINITY_GG_3318_c34_g1_i4 | B1 |
| *Al-otd* | TRINITY_GG_5990_c97_g1_i2 | B3 |
| *Al-peropsin* | TRINITY_GG_4858_c50_g1_i1 | B3 |
| *Al-rhodopsin* | TRINITY_GG_6262_c55_g1_i2 | B3 |
| *Al-Six3* | TRINITY_GG_5990_c859_g1_i1 | B2 |
| *Al-so* | TRINITY_GG_5990_c254_g1_i5 | B3 |
| *Al-toy* | TRINITY_GG_5245_c530_g1_i1 | B1, B2 |
| *Al-wg* | TRINITY_GG_4863_c585_g1_i7 | B2 |

**Table S2:** The transcript IDs and amplifier sequences used to construct each HCR probe. Note that for *Al-toy,* two probe sets were constructed.
