# Supplementary material for: The Expression of Pax6 Genes in an Eyeless Arachnid Suggests Their Ancestral Role in Arachnid Head Development
Source: Research Square preprint supplement (doi:10.21203/rs.3.rs-5920582/v1), 2025-01-30
Supplement: Supplementary file 3 [file 2692cf35f0dae9d3baefa30a.docx]

**Table S15:** Probe pairs designed for *Al-sine oculis* (B3 initiator)

| Pair | Initiator | Spacer | Hybridzation | Hybridzation | Spacer | Initiator |
| --- | --- | --- | --- | --- | --- | --- |
| 1 | GTCCCTGCCTCTATATCT | TT | CATTCATACTCAGCAATAGGAATAG | CATTCATACTAACTTTACGCTTAAG | TT | CCACTCAACTTTAACCCG |
| 2 | GTCCCTGCCTCTATATCT | TT | TCGTGTCTCTCTCTCTCTCTCTCTC | AAAATTCACTACCAAACATCAAAAT | TT | CCACTCAACTTTAACCCG |
| 3 | GTCCCTGCCTCTATATCT | TT | TTTCTCTCTCATAGCTCTCTATCCT | GCTCTCTGTCTCTCTCTCACACCTC | TT | CCACTCAACTTTAACCCG |
| 4 | GTCCCTGCCTCTATATCT | TT | AATTGAGTCTCTGAGATAATGGTGG | ATTAAGTGACCAAAACTTGACAGAC | TT | CCACTCAACTTTAACCCG |
| 5 | GTCCCTGCCTCTATATCT | TT | TTTATCGTACAGAAAGTCTGGTTTG | ATAAGTAATAACTGGCAGTTTGTCT | TT | CCACTCAACTTTAACCCG |
| 6 | GTCCCTGCCTCTATATCT | TT | CACAGTTAATGGTCTCTCACAGTTG | TCCTAATAATTGCTGGAATGTGTAA | TT | CCACTCAACTTTAACCCG |
| 7 | GTCCCTGCCTCTATATCT | TT | ATCAACACCAGAAGCAGCCGCCACT | ATGTGATCCTCCGATAGTAGATCCG | TT | CCACTCAACTTTAACCCG |
| 8 | GTCCCTGCCTCTATATCT | TT | GCCAAATGGTGGGAATGATGAGGAT | ATGACTAGCGCAGACGGCGCCACAT | TT | CCACTCAACTTTAACCCG |
| 9 | GTCCCTGCCTCTATATCT | TT | ATCGAAATCCGTGATACATCGCCGA | ATGTCGATCCGATGTGGTGATGATT | TT | CCACTCAACTTTAACCCG |
| 10 | GTCCCTGCCTCTATATCT | TT | TGTCACTGAACTCAGCTGTTGATGA | CGCAGTAGCCGCTGATTGACTGGCC | TT | CCACTCAACTTTAACCCG |
| 11 | GTCCCTGCCTCTATATCT | TT | TTACCCATGTTGTGAACTAAATGGT | TGACCTGTATTCGACTGATTGTGAT | TT | CCACTCAACTTTAACCCG |
| 12 | GTCCCTGCCTCTATATCT | TT | CCTCATTGGAAGAGTCATCGCCGCT | AACTACTACTCGTTCGAAGTGATGT | TT | CCACTCAACTTTAACCCG |
| 13 | GTCCCTGCCTCTATATCT | TT | TGGTTTAGCACCAGATTTAATACTA | GTTGCCAGAGTTGGAGGAATCATTG | TT | CCACTCAACTTTAACCCG |
| 14 | GTCCCTGCCTCTATATCT | TT | CTATCTTTAGCTTCAGCGGCTCTAT | CCAGAATTGGTTTTATCGGAAGGAT | TT | CCACTCAACTTTAACCCG |
| 15 | GTCCCTGCCTCTATATCT | TT | TCACTTGTGTTGTCGTAAGTCCTGT | TCTGTCGCCTATTTTTGAACCAATT | TT | CCACTCAACTTTAACCCG |
| 16 | GTCCCTGCCTCTATATCT | TT | CGAAGGATAAGGATTGTGAGCATAC | TTCGGCCAGTTCTCTCTTTTCTCGA | TT | CCACTCAACTTTAACCCG |
| 17 | GTCCCTGCCTCTATATCT | TT | TTGAAACAATAAGATGTCTCTTCTC | TCGCGAAGAACATTTCGCGATTTTT | TT | CCACTCAACTTTAACCCG |
| 18 | GTCCCTGCCTCTATATCT | TT | TGCGTCTTATGCGGTATTTGCCCAC | CCCATATAGTACGAGGTAATGGAAA | TT | CCACTCAACTTTAACCCG |
| 19 | GTCCCTGCCTCTATATCT | TT | TGCTTCTATATAATGTGCTTTCAGC | ACCTAATGGACGTCCGCGAAGACGC | TT | CCACTCAACTTTAACCCG |
| 20 | GTCCCTGCCTCTATATCT | TT | AAAATTGTGACTTTCTAGGATTCGG | TTGTAGTTTTGGATGAGATGATGGA | TT | CCACTCAACTTTAACCCG |
| 21 | GTCCCTGCCTCTATATCT | TT | CTACCAAAGCTTTAGCTTTAAGTAC | GTTCTTTGAAATTGCCCCTGTTAAA | TT | CCACTCAACTTTAACCCG |
| 22 | GTCCCTGCCTCTATATCT | TT | AGGCAATGACCATAAAAATCGTCCC | TTCATTCTTTTGTAACTGTTCACAT | TT | CCACTCAACTTTAACCCG |
| 23 | GTCCCTGCCTCTATATCT | TT | ACTTCACAAACACATGCAACTTGTT | CTTTCAATATTGCCCGACTGTTGAA | TT | CCACTCAACTTTAACCCG |
| 24 | GTCCCTGCCTCTATATCT | TT | CTGGCGAAGTAGGGTTGGGACATCC | GAGTGAATCCAAACGATGGTAGAAG | TT | CCACTCAACTTTAACCCG |
| 25 | GTCCCTGCCTCTATATCT | TT | GTACAGCACTGGCCATTCCTGGTAT | GAGGACCACCAATATGCCCACTGAG | TT | CCACTCAACTTTAACCCG |
| 26 | GTCCCTGCCTCTATATCT | TT | TCCGACAATCATTCCACTTATTAAG | AATAGCGTTGGACGCATCCGTCATA | TT | CCACTCAACTTTAACCCG |
| 27 | GTCCCTGCCTCTATATCT | TT | TCAGATTTGAGGTAAGGCTCTGAAG | CAATTCATTAAAACCCGAACAAATT | TT | CCACTCAACTTTAACCCG |
| 28 | GTCCCTGCCTCTATATCT | TT | TGATTAGACTTTGCGCACGTTTTGC | AGTATTGTCTGTCGAGCAAAACAGC | TT | CCACTCAACTTTAACCCG |
| 29 | GTCCCTGCCTCTATATCT | TT | TTTACTCAGTTTGAGTTCTGTTCTG | TCTGCCGACAGATTCTCACTGAATG | TT | CCACTCAACTTTAACCCG |
| 30 | GTCCCTGCCTCTATATCT | TT | AATTCAATCTAAAACCCTTGAGGCC | AGTATTCACAGACACACAAATATCT | TT | CCACTCAACTTTAACCCG |
| 31 | GTCCCTGCCTCTATATCT | TT | GCCGGGAGAACAAAATCAACTGCTT | AGAAGCGTTGCCTGTATTAGATGTT | TT | CCACTCAACTTTAACCCG |
| 32 | GTCCCTGCCTCTATATCT | TT | AAGAAGTCTCTCTGAAGAAGCTCTC | TGCTCAAGACTGAAGAAGTCCTCTC | TT | CCACTCAACTTTAACCCG |
| 33 | GTCCCTGCCTCTATATCT | TT | TGACTGAAGTGGCAACTCGAGACTC | GAAGAAATTCTCTGTGAAGAAAAAT | TT | CCACTCAACTTTAACCCG |
| 34 | GTCCCTGCCTCTATATCT | TT | TAGCCAAAAGTCAAGCTTAATCTGT | GCATGAGATTTGGAAGAACCGAAAC | TT | CCACTCAACTTTAACCCG |
| 35 | GTCCCTGCCTCTATATCT | TT | ACTGCGAAACTGCAATACTTTCCGC | AGCGCAAGGCATGCATTACATTATG | TT | CCACTCAACTTTAACCCG |
| 36 | GTCCCTGCCTCTATATCT | TT | CAATGGCTGCTCAATACCAACTCTC | TCACAGACTAGTCGTTCCCAAACGA | TT | CCACTCAACTTTAACCCG |
| 37 | GTCCCTGCCTCTATATCT | TT | AACCTTGCAATCACCGCCCGTTTTA | TTGCTATTGGCTCAAATTTTTCTGC | TT | CCACTCAACTTTAACCCG |
| 38 | GTCCCTGCCTCTATATCT | TT | TCTTTCATTTCTTTCCATCCCATCT | TCTTCATCATACTGTAGTGGAAGTA | TT | CCACTCAACTTTAACCCG |
