# Supplementary material for: The Expression of Pax6 Genes in an Eyeless Arachnid Suggests Their Ancestral Role in Arachnid Head Development
Source: Research Square preprint supplement (doi:10.21203/rs.3.rs-5920582/v1), 2025-01-30
Supplement: Supplementary file 8 [file 98575fe924df0b503aa94268.docx]

| Pair | Initiator | Spacer | Hybridzation | Hybridzation | Spacer | Initiator |
| --- | --- | --- | --- | --- | --- | --- |
| 1 | GAGGAGGGCAGCAAACGG | AA | AATACGTGGCCAATAATTGGAAGCG | TACAAATTAATCAATGAATGGTCAC | TA | GAAGAGTCTTCCTTTACG |
| 2 | GAGGAGGGCAGCAAACGG | AA | GGAACTGATACTCCCGGAGATATCA | TCACTGTTCTGACCGGGCACTTGCA | TA | GAAGAGTCTTCCTTTACG |
| 3 | GAGGAGGGCAGCAAACGG | AA | CAGCGAACTGTCCGTTCACTGTTTG | CAGTAGAAGTCGTTGAGTTGTTGAC | TA | GAAGAGTCTTCCTTTACG |
| 4 | GAGGAGGGCAGCAAACGG | AA | TGGACGCGAATAACTTCCGAGTGTT | GTGAACCTGTGCTGCTGACGGACAC | TA | GAAGAGTCTTCCTTTACG |
| 5 | GAGGAGGGCAGCAAACGG | AA | AACATACATGAATAGGAAGAGGCAG | GGATCATAATTACGTCCGGGTGGTG | TA | GAAGAGTCTTCCTTTACG |
| 6 | GAGGAGGGCAGCAAACGG | AA | AAGAGTTAGGGGTCATATTGTTGGC | CCGCTGCAGCCGCTTGTTGTTGAAG | TA | GAAGAGTCTTCCTTTACG |
| 7 | GAGGAGGGCAGCAAACGG | AA | GTAAGTGTCAGCCATTGATGCCATC | CGAATATGACGACATTCCCATTGAA | TA | GAAGAGTCTTCCTTTACG |
| 8 | GAGGAGGGCAGCAAACGG | AA | GCAAAACCCGAATTGATTGGAAGCC | TGTGGAATTGTCGGATATAATGAAT | TA | GAAGAGTCTTCCTTTACG |
| 9 | GAGGAGGGCAGCAAACGG | AA | GCCTGCTCTGCAGCCCTCCTTTGAT | GTGTTATGGCTGTGATGGACGACTG | TA | GAAGAGTCTTCCTTTACG |
| 10 | GAGGAGGGCAGCAAACGG | AA | CGCGTCTATTGGAGAACCAAACCTG | TCAACTTTTCTTCACGTCTCCATTT | TA | GAAGAGTCTTCCTTTACG |
| 11 | GAGGAGGGCAGCAAACGG | AA | CTCAGGCAAATCGATTTTGGCCGCG | AATATGATCGTATGCCTGAATTCTA | TA | GAAGAGTCTTCCTTTACG |
| 12 | GAGGAGGGCAGCAAACGG | AA | TGAGTGCGCTCGAACTCTTTTTCTA | CGCTCTCGAGCGAACACATCGGGAT | TA | GAAGAGTCTTCCTTTACG |
| 13 | GAGGAGGGCAGCAAACGG | AA | TCCTATTTCGCTGTAATTTTCTCTT | CTTCGATCTGTTCGGGTGTAAACGA | TA | GAAGAGTCTTCCTTTACG |
| 14 | GAGGAGGGCAGCAAACGG | AA | AGAGCCGTCGTTGTGAGACGAATCT | TCTAAGTCTCGCTGCGGAATCGCCT | TA | GAAGAGTCTTCCTTTACG |
| 15 | GAGGAGGGCAGCAAACGG | AA | GTGGTCGGCGGCGGAACTGTAGGCA | TTTTTATGAGAATTTCCATTTTCAA | TA | GAAGAGTCTTCCTTTACG |
| 16 | GAGGAGGGCAGCAAACGG | AA | TCTGACCGTTAAGAATACGCAACTT | GATACCAGGGTGACGGTCGCGGCCA | TA | GAAGAGTCTTCCTTTACG |
| 17 | GAGGAGGGCAGCAAACGG | AA | GGTTTGTTGTTCTTTTTGTGCAGCA | ATATACAGCATCGGCTGCCTGTGAG | TA | GAAGAGTCTTCCTTTACG |
| 18 | GAGGAGGGCAGCAAACGG | AA | ACAGACGGTACGTTGTCATTAGTAC | TTACGAAGAACTCGATTGATTGACG | TA | GAAGAGTCTTCCTTTACG |
| 19 | GAGGAGGGCAGCAAACGG | AA | TTTCCCAGGCAAATATTGAGGGACA | CGCCTTCTGACAAAAGTCTGTCCCT | TA | GAAGAGTCTTCCTTTACG |
| 20 | GAGGAGGGCAGCAAACGG | AA | AACATCAGATGTGGCCACACGTGGT | GCGCTTGTACTGCGCTATTTTCGAG | TA | GAAGAGTCTTCCTTTACG |
| 21 | GAGGAGGGCAGCAAACGG | AA | CCGGTCTCGTAATATCGGCCCAATA | CCACCGATAGCTCGCGGACGTATTG | TA | GAAGAGTCTTCCTTTACG |
| 22 | GAGGAGGGCAGCAAACGG | AA | GAATGCGCGATATATCGCAAGGTCG | TAGACACGCAACCATTTGATACCTG | TA | GAAGAGTCTTCCTTTACG |
| 23 | GAGGAGGGCAGCAAACGG | AA | TCACGTAAACACCGCCCAATTGATT | TGGTCGAGTCCGGTAGAGGACGACC | TA | GAAGAGTCTTCCTTTACG |
| 24 | GAGGAGGGCAGCAAACGG | AA | GCAGTGTTCCTGCTGTGATAATACT | ACCCGAGTGACCTTTGTGGGGCATT | TA | GAAGAGTCTTCCTTTACG |
| 25 | GAGGAGGGCAGCAAACGG | AA | CCAGTTGATTTACACCAGTCTTATT | GACACCACTGATGCCGTTGTGATCA | TA | GAAGAGTCTTCCTTTACG |
| 26 | GAGGAGGGCAGCAAACGG | AA | CGATCAATAGATTGAACACGCATTG | ATGGCCAACTATTATCAAACACTAT | TA | GAAGAGTCTTCCTTTACG |
| 27 | GAGGAGGGCAGCAAACGG | AA | AATATAAGGCCATTCAAATGCAATC | AATAAAGATCAGGGCGTATCACAGA | TA | GAAGAGTCTTCCTTTACG |
| 28 | GAGGAGGGCAGCAAACGG | AA | GATTAATATATAGCACTTTGAGCCG | TCACTATAGAGTTCATAACTAAGTC | TA | GAAGAGTCTTCCTTTACG |
| 29 | GAGGAGGGCAGCAAACGG | AA | GAAGTAAAACAGAGCCAAACAGACG | TATATGTTGTATTATAGCAGATGGA | TA | GAAGAGTCTTCCTTTACG |

**Table S7:** Probe pairs designed for *Al-ey* HCRs (B1 initiator)
