# Supplementary material for: The Expression of Pax6 Genes in an Eyeless Arachnid Suggests Their Ancestral Role in Arachnid Head Development
Source: Research Square preprint supplement (doi:10.21203/rs.3.rs-5920582/v1), 2025-01-30
Supplement: Supplementary file 10 [file c5e171bbc73f33b4221e2436.docx]

**Table S4:** Probe pairs designed for *Al-arrestin-2* HCRs (B1 initiator)

| Pair | Initiator | Spacer | Hybridzation | Hybridzation | Spacer | Initiator |
| --- | --- | --- | --- | --- | --- | --- |
| 1 | GAGGAGGGCAGCAAACGG | AA | CATAAGAGATAACAATACCAATTGC | CACCGACGTATAGCCTGACGCGAAT | TA | GAAGAGTCTTCCTTTACG |
| 2 | GAGGAGGGCAGCAAACGG | AA | TAGATCAGTATCTGTTTCTCTGAGC | ATCAGATTGTGAGAATGTGGTTGAA | TA | GAAGAGTCTTCCTTTACG |
| 3 | GAGGAGGGCAGCAAACGG | AA | TTGTTTTGTTGTGCCGATGGGATCA | CCGTTTAATGCAATCCCTCTTTTGT | TA | GAAGAGTCTTCCTTTACG |
| 4 | GAGGAGGGCAGCAAACGG | AA | CATTTACAGGGTATCCATCACGAGA | GATAGACTTTAGAGAGTGATGCGCC | TA | GAAGAGTCTTCCTTTACG |
| 5 | GAGGAGGGCAGCAAACGG | AA | CTTCTGTTCGTTGAATGGCGGAAAC | TACTATAATGACCACTTATGAAATT | TA | GAAGAGTCTTCCTTTACG |
| 6 | GAGGAGGGCAGCAAACGG | AA | GCCGTGAAAGTATAGTTCTCGATCG | TATTATAACGTTAACCGATATGACA | TA | GAAGAGTCTTCCTTTACG |
| 7 | GAGGAGGGCAGCAAACGG | AA | CTGAACATAAAACTCTTACTGATCG | CTCACTTCAAGATTCAATTTGCCGG | TA | GAAGAGTCTTCCTTTACG |
| 8 | GAGGAGGGCAGCAAACGG | AA | CTAATAGCCATTGAAACTGAGTCGG | ATTGATTGCTTAACGAACTGTAGTT | TA | GAAGAGTCTTCCTTTACG |
| 9 | GAGGAGGGCAGCAAACGG | AA | CATATTCTATTCCAAGAGGTGGTCC | CTTTATCAGTTACATACAAGATCAG | TA | GAAGAGTCTTCCTTTACG |
| 10 | GAGGAGGGCAGCAAACGG | AA | AGACGGCGGGGCGTTATGCGGCAAT | ATCTTCAGGACCAGGTTGTATAGTG | TA | GAAGAGTCTTCCTTTACG |
| 11 | GAGGAGGGCAGCAAACGG | AA | AGTTTTTGCACGAGTCGTTCCTGAA | AATGTGAAAGGAATAGCATTGGGAC | TA | GAAGAGTCTTCCTTTACG |
| 12 | GAGGAGGGCAGCAAACGG | AA | ATTTCGTCTTCTTCTCTTCCATATC | AATTGTCGTGAAAAGTTGAGTCCCA | TA | GAAGAGTCTTCCTTTACG |
| 13 | GAGGAGGGCAGCAAACGG | AA | ATCTTTAAGATATTGTTGGTCTACC | GGCTGTGATTTGACCAAATAACTGT | TA | GAAGAGTCTTCCTTTACG |
| 14 | GAGGAGGGCAGCAAACGG | AA | TCTTGATGATCACCAAAATCTCGAT | ACAACTCCATTGAGTGGATCACAAT | TA | GAAGAGTCTTCCTTTACG |
