# Supplementary material for: The Expression of Pax6 Genes in an Eyeless Arachnid Suggests Their Ancestral Role in Arachnid Head Development
Source: Research Square preprint supplement (doi:10.21203/rs.3.rs-5920582/v1), 2025-01-30
Supplement: Supplementary file 11 [file c91c9a37bc9f2a0b13aaf0af.docx]

**Table S8:** Probe pairs designed for *Al-eya* HCRs (B2 initiator)

| Pair | Initiator | Spacer | Hybridzation | Hybridzation | Spacer | Initiator |
| --- | --- | --- | --- | --- | --- | --- |
| 1 | CCTCGTAAATCCTCATCA | AA | AGACTTCACAAGTTTGTGGCGTTAG | GTTACACCACATTTTCAAGTTTCAA | AA | ATCATCCAGTAAACCGCC |
| 2 | CCTCGTAAATCCTCATCA | AA | AACATCTTGATCACTTGAAAGCGTT | AACTCAATACTAGTCGCCAAGCAAT | AA | ATCATCCAGTAAACCGCC |
| 3 | CCTCGTAAATCCTCATCA | AA | TTTGAAGTACTAATAAAGTGGCAAG | AAATCGCGTCAGTTCAGACCAAAAA | AA | ATCATCCAGTAAACCGCC |
| 4 | CCTCGTAAATCCTCATCA | AA | AATTGTTCAGCTTATAATCAATTTG | GGTCGCAACACGTCAACTAATACAG | AA | ATCATCCAGTAAACCGCC |
| 5 | CCTCGTAAATCCTCATCA | AA | ACTCCTTCTTCACGAAAATTCTGCG | CAAATGAATGTCAGCAAATTGTTTC | AA | ATCATCCAGTAAACCGCC |
| 6 | CCTCGTAAATCCTCATCA | AA | GAGGCCACACCGAATATCATTACTT | CTGTAAATGTTTTCGATCGCAAAGT | AA | ATCATCCAGTAAACCGCC |
| 7 | CCTCGTAAATCCTCATCA | AA | GCCATTTTTCTGAGCCAGTCTACAC | ATTTCTTTGATGCGTCTATATCTAA | AA | ATCATCCAGTAAACCGCC |
| 8 | CCTCGTAAATCCTCATCA | AA | CTTCCAATTGCATGCCTAAGTCATA | GGTTTTCAGCGAATCTGTTGAGCAG | AA | ATCATCCAGTAAACCGCC |
| 9 | CCTCGTAAATCCTCATCA | AA | TTGGAGTTTCCGTCTTTATAGGGGA | TTTTTGGCGCTATAGGTATAGCATT | AA | ATCATCCAGTAAACCGCC |
| 10 | CCTCGTAAATCCTCATCA | AA | GGCATGGCTGAAACCACCATATGTG | AGTGGAATAGTAGGGCGAATAACCA | AA | ATCATCCAGTAAACCGCC |
| 11 | CCTCGTAAATCCTCATCA | AA | TGGCGATGGATTCAAATAAGCGGCC | AGTATTAGTGGTAAAAGTTGTACTA | AA | ATCATCCAGTAAACCGCC |
| 12 | CCTCGTAAATCCTCATCA | AA | AAGGACTTTGATATGCAGCCTGCAT | CTGCAGCAGCAGCTGAACCGGCGCT | AA | ATCATCCAGTAAACCGCC |
| 13 | CCTCGTAAATCCTCATCA | AA | CCCAACTGTGATGATAATCTGTTGG | CCACTTTTACATCGTTTCCACACAT | AA | ATCATCCAGTAAACCGCC |
| 14 | CCTCGTAAATCCTCATCA | AA | TCTTGTCAGCGAATGGACTCGAAAC | GAGATGAAGATATAGTATTGCCTTT | AA | ATCATCCAGTAAACCGCC |
| 15 | CCTCGTAAATCCTCATCA | AA | CTTCGTCTAAATGTTGCTGTGACTT | TGTCCGAACTTAACAGGTCAGACGA | AA | ATCATCCAGTAAACCGCC |
| 16 | CCTCGTAAATCCTCATCA | AA | GATTAATGTTGAGCAGTAACATACC | CCTTAAAAAGTTTGATCGCAGCAAA | AA | ATCATCCAGTAAACCGCC |
| 17 | CCTCGTAAATCCTCATCA | AA | TGCTCTCATTTATTTATTGCAAGCG | AGCGATGCATATGCATAATCAAACA | AA | ATCATCCAGTAAACCGCC |
| 18 | CCTCGTAAATCCTCATCA | AA | CAACTACTAATTCTCATCAATGGGG | TTTTACATTTTACACCCTCAAACTC | AA | ATCATCCAGTAAACCGCC |
| 19 | CCTCGTAAATCCTCATCA | AA | TCTTATTGCTCTACAAGTCCTTCGA | CTTTCTTAAGCGCTATAACGAGACA | AA | ATCATCCAGTAAACCGCC |
| 20 | CCTCGTAAATCCTCATCA | AA | CTCCAAATCGACTTCCCTTTCGCTT | TGCTCTTATGCTTGATTGAAGGAAG | AA | ATCATCCAGTAAACCGCC |
