# Supplementary material for: The Expression of Pax6 Genes in an Eyeless Arachnid Suggests Their Ancestral Role in Arachnid Head Development
Source: Research Square preprint supplement (doi:10.21203/rs.3.rs-5920582/v1), 2025-01-30
Supplement: Supplementary file 13 [file dd820b7f2c2d6fdbcfb7b8c7.docx]

**Table S12:** Probe pairs designed for *Al-peropsin* (B3 initiator).

| Pair | Initiator | Spacer | Hybridzation | Hybridzation | Spacer | Initiator |
| --- | --- | --- | --- | --- | --- | --- |
| 1 | GTCCCTGCCTCTATATCT | TT | TCTCTAAACTGTTGGCTTATCCGAC | ATTTCACTTTCGATTTTCTGCTAAT | TT | CCACTCAACTTTAACCCG |
| 2 | GTCCCTGCCTCTATATCT | TT | AACATCCACAAAGCGAACAACTCTT | TTGAGTTAAGCTACTCTGGTCTTTG | TT | CCACTCAACTTTAACCCG |
| 3 | GTCCCTGCCTCTATATCT | TT | AAGTCGATTATTGGTTAGGTAGTAG | AAAAACGGATGATAAGAAAGCTCCT | TT | CCACTCAACTTTAACCCG |
| 4 | GTCCCTGCCTCTATATCT | TT | GCAAATAGTGGCGGAACCAAAGTGA | ATTGGATTAAACAGTGTAGAGGTTT | TT | CCACTCAACTTTAACCCG |
| 5 | GTCCCTGCCTCTATATCT | TT | ATACTGTCCACAAGCAGAGTATCGC | AAAGAGGAACTGTTTTAGGATCACC | TT | CCACTCAACTTTAACCCG |
| 6 | GTCCCTGCCTCTATATCT | TT | AACTATGATAGTCGACATTATAGTT | GGGAGACCACGAAAACACAAATACA | TT | CCACTCAACTTTAACCCG |
| 7 | GTCCCTGCCTCTATATCT | TT | ATTAATTCCAGCGTTTCCTCGCTTA | TTTTTCCCTAACCCAAATGTCTTCT | TT | CCACTCAACTTTAACCCG |
| 8 | GTCCCTGCCTCTATATCT | TT | GCATAATAGCAGTAGAAAATAACGC | GAACCATTCCTGACTTTACTAACAA | TT | CCACTCAACTTTAACCCG |
| 9 | GTCCCTGCCTCTATATCT | TT | TTATGTCTCCAATCTATAGTACACG | ATTATGAATGATTTATAAGCCGCGT | TT | CCACTCAACTTTAACCCG |
| 10 | GTCCCTGCCTCTATATCT | TT | CCCAACCTATTAATGGCATTAATGC | TTATACTTGAATCCAAGCCATATCT | TT | CCACTCAACTTTAACCCG |
| 11 | GTCCCTGCCTCTATATCT | TT | ATTTGCAGTAATTGTATTTATCCCG | AAGAGTACAACCAAACAGCGTTTAT | TT | CCACTCAACTTTAACCCG |
| 12 | GTCCCTGCCTCTATATCT | TT | CAAAGCCAGTAATGTTAAAGTGCCG | CTTTTGGCAAGAAATATTATATCTG | TT | CCACTCAACTTTAACCCG |
| 13 | GTCCCTGCCTCTATATCT | TT | AAAGCATATGCTTGACAGCCATCAT | TGTGCAGAACCTGCCAGAAACCCCA | TT | CCACTCAACTTTAACCCG |
