# Supplementary material for: The Expression of Pax6 Genes in an Eyeless Arachnid Suggests Their Ancestral Role in Arachnid Head Development
Source: Research Square preprint supplement (doi:10.21203/rs.3.rs-5920582/v1), 2025-01-30
Supplement: Supplementary file 14 [file dff82c2eb6d54a231e8c09be.docx]

**Table S13:** Probe pairs designed for *Al-rhodopsin* HCRs (B3 initiator)

| Pair | Initiator | Spacer | Hybridzation | Hybridzation | Spacer | Initiator |
| --- | --- | --- | --- | --- | --- | --- |
| 1 | GTCCCTGCCTCTATATCT | TT | GTTTTATTAAAATGGGTAAACTTTA | CCTACACGACGCTCTTCCGATCTCA | TT | CCACTCAACTTTAACCCG |
| 2 | GTCCCTGCCTCTATATCT | TT | CTGATTGTTGTTAACCTCAGATTCG | TTTAACTCATAAAAGTGTGTGTTGT | TT | CCACTCAACTTTAACCCG |
| 3 | GTCCCTGCCTCTATATCT | TT | AGCCAACATATGACACGAATAGAAC | AAACGGATTATAGCAGATTGAACTC | TT | CCACTCAACTTTAACCCG |
| 4 | GTCCCTGCCTCTATATCT | TT | AATATGAAAGCAATTCAAAGGCAAC | GATGACTTCTGGACTAAAATCGGCA | TT | CCACTCAACTTTAACCCG |
| 5 | GTCCCTGCCTCTATATCT | TT | CTTTTCTGGATATCATTCTCTCCCG | ATAATCTTTCGATCAGATCTTTTGA | TT | CCACTCAACTTTAACCCG |
| 6 | GTCCCTGCCTCTATATCT | TT | TCTCACATAAGCGACTGTTGTTATC | ATATTTTCTTCTTATCTGACACCCG | TT | CCACTCAACTTTAACCCG |
| 7 | GTCCCTGCCTCTATATCT | TT | TCTGGATATATAGCTCTGCATCGAG | ATTATTTGTCGAGATCTATTTTGTG | TT | CCACTCAACTTTAACCCG |
| 8 | GTCCCTGCCTCTATATCT | TT | GTATCTATCGATAGCTATTACGGCC | TTGATAAAACCTAGAGTTTATTGCT | TT | CCACTCAACTTTAACCCG |
| 9 | GTCCCTGCCTCTATATCT | TT | ACCTGCATTGAAGGCAATAGTTTGC | GTGAACGTTGAAACATATACAAAAG | TT | CCACTCAACTTTAACCCG |
| 10 | GTCCCTGCCTCTATATCT | TT | GCAATATCCTCGCGATAATGAACGG | AAATCACACCAAAAGGCCAGTTATT | TT | CCACTCAACTTTAACCCG |
| 11 | GTCCCTGCCTCTATATCT | TT | TGGTTTGATCGGAAAAATTGAAACC | ACTTGAGTTTTGCACTGAATCCATC | TT | CCACTCAACTTTAACCCG |
