# Supplementary material for: The Expression of Pax6 Genes in an Eyeless Arachnid Suggests Their Ancestral Role in Arachnid Head Development
Source: Research Square preprint supplement (doi:10.21203/rs.3.rs-5920582/v1), 2025-01-30
Supplement: Supplementary file 15 [file e35b9974949afeff5e15d0ab.docx]

| Pair | Initiator | Spacer | Hybridzation | Hybridzation | Spacer | Initiator |
| --- | --- | --- | --- | --- | --- | --- |
| 1 | CCTCGTAAATCCTCATCA | AA | CTGGAAAACAGACTTTGTATTGAAG | AAAACACAGGTCATGCTAAACATCG | AA | ATCATCCAGTAAACCGCC |
| 2 | CCTCGTAAATCCTCATCA | AA | TATGTGCGTGCCACCTCACAATTTC | AATCAGTTATTAATTGTTTGCTTGA | AA | ATCATCCAGTAAACCGCC |
| 3 | CCTCGTAAATCCTCATCA | AA | CTTCAAGCACCGAGGCTTCATCATT | CTTTTGGTCACACGACACGCCCCTT | AA | ATCATCCAGTAAACCGCC |
| 4 | CCTCGTAAATCCTCATCA | AA | CCAACATCTACATCATCGTCATCAT | GTCGAGACGGCTGTCGGGCTTAGGG | AA | ATCATCCAGTAAACCGCC |
| 5 | CCTCGTAAATCCTCATCA | AA | AGCACTGTTGGCGGTACCGGCTAAT | ATTGAGAAGATGCGTTTTCTGGTTA | AA | ATCATCCAGTAAACCGCC |
| 6 | CCTCGTAAATCCTCATCA | AA | AATGTCCGCCACTTGAACTACGGTT | TCGAACCATTCCTGCCACTACTGCC | AA | ATCATCCAGTAAACCGCC |
| 7 | CCTCGTAAATCCTCATCA | AA | TTTCCCACTTGTGTTGGTGTTAATC | TCACGTTGTCTTCTGTTTTTAAACC | AA | ATCATCCAGTAAACCGCC |
| 8 | CCTCGTAAATCCTCATCA | AA | TTCTTTAAAACAGTGCGTCTTCTGT | CCACTCTCTTAGTAGAGATCTGGTT | AA | ATCATCCAGTAAACCGCC |
| 9 | CCTCGTAAATCCTCATCA | AA | CATCGCTTGTAATTTCGAATGTGAT | AGCTTCTTGATAGTGTGCCTCCAAC | AA | ATCATCCAGTAAACCGCC |
| 10 | CCTCGTAAATCCTCATCA | AA | GTATGAAAAGCCACTAAAGCTCTGG | ATATGATATAGTTCTCTGAAATTTC | AA | ATCATCCAGTAAACCGCC |
| 11 | CCTCGTAAATCCTCATCA | AA | CAGCACAGTTTGGATGAGCCACTGG | TTAGAACAGATTCATTTTTATTAAG | AA | ATCATCCAGTAAACCGCC |
| 12 | CCTCGTAAATCCTCATCA | AA | AATATCTCCACTTTCTTCTAGTGTC | TGACCACAGAAACCTTCCTAGTCTT | AA | ATCATCCAGTAAACCGCC |
| 13 | CCTCGTAAATCCTCATCA | AA | AAGTTTAAAGTCGGTAACATAAACA | CAAACAGCGGCCACTTGACTCACAG | AA | ATCATCCAGTAAACCGCC |
| 14 | CCTCGTAAATCCTCATCA | AA | TGGACTGGCTGAAGAACCAGTTGAT | AGCTGCCGATGCAGTGGCAGCTGAT | AA | ATCATCCAGTAAACCGCC |
| 15 | CCTCGTAAATCCTCATCA | AA | CCAGATGTAGGGATTGGCTGATGCA | GCTGTGCCCAAACCCAATGCCGTCA | AA | ATCATCCAGTAAACCGCC |
| 16 | CCTCGTAAATCCTCATCA | AA | ACGATCGAGACGCTATTGTGTTATT | AAGGCAAAGGCAGCGCCGACAATGT | AA | ATCATCCAGTAAACCGCC |
| 17 | CCTCGTAAATCCTCATCA | AA | GATGAACAGCTAGATGATGATGAGG | AATGATAAATATGCTGCAGAATTGG | AA | ATCATCCAGTAAACCGCC |
| 18 | CCTCGTAAATCCTCATCA | AA | AAGCACCACAACTACTAATATCCGT | AAGATGAGCCGTCACCAGGATGAAG | AA | ATCATCCAGTAAACCGCC |
| 19 | CCTCGTAAATCCTCATCA | AA | AGAAGCTGTCTCACCAGAAATGCCG | ATATATATTACTAATAACCAGATAA | AA | ATCATCCAGTAAACCGCC |
| 20 | CCTCGTAAATCCTCATCA | AA | TGTAAACTATCACTAGAGGATTGCG | ATGCAATAGTGATATCAAGAACACA | AA | ATCATCCAGTAAACCGCC |

**Table S14:** Probe pairs designed for *Al-Six3* HCRs (B2 initiator)
