# Supplementary material for: The Expression of Pax6 Genes in an Eyeless Arachnid Suggests Their Ancestral Role in Arachnid Head Development
Source: Research Square preprint supplement (doi:10.21203/rs.3.rs-5920582/v1), 2025-01-30
Supplement: Supplementary file 16 [file e8594230d18cc1d06347dae9.docx]

**Table S5:** Probe pairs designed for *Al-atonal* HCRs (B2 initiator)

| Pair | Initiator | Spacer | Hybridzation | Hybridzation | Spacer | Initiator |
| --- | --- | --- | --- | --- | --- | --- |
| 1 | CCTCGTAAATCCTCATCA | AA | ATAATTGAAGCCATGAAACAAAGCC | TCAGAGTAGTAATTGAGCGTTTCAT | AA | ATCATCCAGTAAACCGCC |
| 2 | CCTCGTAAATCCTCATCA | AA | ATTTTGATAGCTTTCTATCGTCTCC | AGCTCTGCGCCATTTGGAGTGTTTC | AA | ATCATCCAGTAAACCGCC |
| 3 | CCTCGTAAATCCTCATCA | AA | AAAGGCAATATTTAGAGAATGCATT | CGAAGGCACAACTTCTCGAAGTCGA | AA | ATCATCCAGTAAACCGCC |
| 4 | CCTCGTAAATCCTCATCA | AA | CGTCTTTTCTTAACAATGACTTGAG | CGTCTTTCTCTAGCATTAGCCGCTA | AA | ATCATCCAGTAAACCGCC |
| 5 | CCTCGTAAATCCTCATCA | AA | CGGTGAGCTTTCCTCCACTTTGCTC | TTCATATTTACTTTTAGACTTGTTT | AA | ATCATCCAGTAAACCGCC |
| 6 | CCTCGTAAATCCTCATCA | AA | TAGTCATCGCTGTCCAAAGAGCCAA | CTTTTCCACACCATATCATCCAACT | AA | ATCATCCAGTAAACCGCC |
| 7 | CCTCGTAAATCCTCATCA | AA | CATTAGGTGATTGTAATGATGAGCC | ATGATTTCTGTGATCCGGACATCTT | AA | ATCATCCAGTAAACCGCC |
| 8 | CCTCGTAAATCCTCATCA | AA | ATTCGAGGCGTTTGAGATGACATCG | TAGCTGAAATCTGACTTCTGTCGTA | AA | ATCATCCAGTAAACCGCC |
| 9 | CCTCGTAAATCCTCATCA | AA | GAGGAACAATCGACGTAAGAGTTAG | TCTGGTGTCGACACTGGAGTACAAT | AA | ATCATCCAGTAAACCGCC |
| 10 | CCTCGTAAATCCTCATCA | AA | AATCAAAAAGTGGAAAAGATTGATC | TGGTCTCATTGTCGGAAAGCGAAGA | AA | ATCATCCAGTAAACCGCC |
| 11 | CCTCGTAAATCCTCATCA | AA | TGAAAGAACACCCAACGAAGAGCTT | AAGATGAGTTTGTGTTGGCGAAACT | AA | ATCATCCAGTAAACCGCC |
| 12 | CCTCGTAAATCCTCATCA | AA | GTTATTGTAGCGGATGGCACAACAC | TACTATTGTATACTATAAGGCATTG | AA | ATCATCCAGTAAACCGCC |
| 13 | CCTCGTAAATCCTCATCA | AA | GTGAAGTGGACCAAAGAGACTCAGC | TAAACACGCAATACTTGTTTTAGTT | AA | ATCATCCAGTAAACCGCC |
| 14 | CCTCGTAAATCCTCATCA | AA | AGACAAAGCGCAAAGCCTTCTCATC | TATATGGGACTATAGCTCCACCATA | AA | ATCATCCAGTAAACCGCC |
| 15 | CCTCGTAAATCCTCATCA | AA | CCGAAGGCAACGTCGAGTTTCAAAT | GCGGAGATCCAATCCACGCGCTTTA | AA | ATCATCCAGTAAACCGCC |
| 16 | CCTCGTAAATCCTCATCA | AA | TTTGTGTGAGACTGAGTAACAGGTC | CAACGTATAAATTCAATTCTCTGTC | AA | ATCATCCAGTAAACCGCC |
| 17 | CCTCGTAAATCCTCATCA | AA | TCATAGACTCATTATTATTGGGCGC | TTTCAGTGAAGAGCATTTCAAATGT | AA | ATCATCCAGTAAACCGCC |
| 18 | CCTCGTAAATCCTCATCA | AA | TGTGCTTGCCTGATGAGGTTATACG | TCAGTTTAATTAAATAGTCAAGACT | AA | ATCATCCAGTAAACCGCC |
| 19 | CCTCGTAAATCCTCATCA | AA | AGGTATTCGATGTTTGGGAGAGAAC | TGTTTTGCTGAACAACAACAACAAA | AA | ATCATCCAGTAAACCGCC |
| 20 | CCTCGTAAATCCTCATCA | AA | GTCCTATCACCAACTCTAATAACAT | AACATATCGTCGGGTCATTGCTATA | AA | ATCATCCAGTAAACCGCC |
